1 **Title:**

2 **Volume growth in animal cells is cell cycle dependent and shows additive fluctuations**

3

4 Clotilde Cadart<sup>1,2,3</sup>, Matthieu Piel<sup>2,3</sup>, Marco Cosentino Lagomarsino<sup>4,5</sup>

5 <sup>1</sup> Present address: Molecular and Cell Biology Department, University of California, Berkeley, 142 Life  
6 Sciences Addition #3200, Berkeley, CA 94720-3200, USA

7 <sup>2</sup> Institut Curie, PSL Research University, CNRS, UMR 144, F-75005 Paris, France

8 <sup>3</sup> Institut Pierre-Gilles de Gennes, PSL Research University, F-75005 Paris, France

9 <sup>4</sup> FIRC Institute of Molecular Oncology (IFOM), Milan 20139, Italy

10 <sup>5</sup> Physics Department, University of Milan, and INFN, Milan 20133, Italy

11

12 Correspondence should be addressed to: [clotilde.cadart@berkeley.edu](mailto:clotilde.cadart@berkeley.edu) and [marco.cosentino-](mailto:marco.cosentino-lagomarsino@ifom.eu)  
13 [lagomarsino@ifom.eu](mailto:lagomarsino@ifom.eu)

14

15

16 **Abstract**

17 The way proliferating animal cells coordinate the growth of their mass, volume, and other relevant size  
18 parameters is a long-standing question in biology. Studies focusing on cell mass have identified patterns  
19 of mass growth as a function of time and cell cycle phase, but little is known about volume growth. To  
20 address this question, we improved our fluorescence exclusion method of volume measurement (FXm)  
21 and obtained 1700 single-cell volume growth trajectories of HeLa cells. We find that, during most of the  
22 cell cycle, volume growth is close to exponential and proceeds at a higher rate in S-G2 than in G1.  
23 Comparing the data with a mathematical model, we establish that the cell-to-cell variability in volume  
24 growth arises from constant-amplitude fluctuations in volume steps, rather than fluctuations of the  
25 underlying specific growth rate. We hypothesize that such “additive noise” could emerge from the  
26 processes that regulate volume adaptation to biophysical cues, such as tension or osmotic pressure.

27

28 **Introduction**

29 The regulation of animal cell growth is a central question in cell biology<sup>1-3</sup>, but our knowledge is limited  
30 by the lack of methods to reliably measure cellular growth at the single-cell level. In the last decade,  
31 several sophisticated approaches measuring buoyant mass<sup>4,5</sup>, dry mass<sup>6-9</sup> and volume<sup>10,11</sup> have produced  
32 new data revealing unexpected features at several levels. In particular, in contrast to what has been  
33 observed in unicellular organisms such as *S. pombe*<sup>12,13</sup>, *S. cerevisiae*<sup>14</sup> or *E. coli*<sup>15</sup>, growth patterns of single  
34 animal cells *in vitro* cannot easily be associated to a simple growth mode, such as mono-exponential,  
35 linear or bi-linear. Instead, single animal cells show complex growth patterns that remain poorly  
36 understood to date. Note that to avoid ambiguity we hereon call “growth speed” the time-derivative of  
37 mass or volume (e.g.,  $\frac{dV}{dt}$ ) and “mass- or volume-specific growth rate”, the growth speed divided by mass  
38 or volume (e.g.,  $\frac{1}{V} \frac{dV}{dt}$ ).

39

40 So far, studies on single animal cell growth have focused on patterns observed at timescales ranging from  
41 several hours to a cell cycle. For HeLa cells, growth was reported to couple with cell size, thus contributing

42 to cell size homeostasis<sup>10,16</sup>. These cells were reported to grow, while in G1, at a faster-than-average  
43 volume-specific growth rate if they were born smaller than average<sup>10</sup>. This finding was paralleled by the  
44 observation that inhibition of cell cycle progression or growth pathways has antagonistic effects on mass-  
45 specific growth rate or cell cycle progression respectively<sup>17</sup>. A second type of growth pattern was  
46 identified in studies measuring cell mass, and showed an association between mass-specific growth rate  
47 and cell cycle progression or cell age. One study showed that in L1210 cells that undergo polyploidization,  
48 mass-specific growth rate follows a bell-shaped dependency on mass over the course of each cell cycle,  
49 independently of the increasing mass of the cell as ploidy increases<sup>18</sup>. This suggests that the bell-shape  
50 pattern of mass-specific growth rate is a function of cell cycle progression, not mass itself. Two other  
51 studies reported that the mass growth speed of several cell types displayed periodic oscillations. Although  
52 the characteristics of the oscillations identified differ in the two studies, these results show that mass  
53 growth follows an oscillatory pattern that depends on time since birth<sup>19</sup> or time until division<sup>9</sup>.

54  
55 At shorter timescales (one hour or less) single adherent cells display cell volume<sup>10</sup> and cell mass<sup>5,9</sup> growth  
56 trajectories that vary in time and across cells. These fluctuations have not yet been analyzed in detail, and  
57 their origin remains poorly understood. Mass or volume changes in a given time interval are the combined  
58 consequence of biosynthesis (via transcription and translation) and mechanisms that import or export  
59 mass (import of molecules via endocytosis/exocytosis)<sup>20</sup> or volume (import of water via osmotic balance,  
60 hydrostatic pressure, and membrane turnover)<sup>1</sup>. Variability in growth can thus result from variability in  
61 either or both categories of mechanisms. While seminal studies have revealed the origins of “noise” in  
62 transcription in animal cells<sup>21,22</sup>, the processes leading to noisy mass and volume growth in animal cells  
63 still need exploration.

64  
65 Crucially, with most of the above-cited studies focusing on cell mass, volume growth remains poorly  
66 characterized, although it is clear that it follows independent patterns from cell mass throughout the cell  
67 cycle<sup>11,23,24</sup>. Regarding cell volume, open questions remain regarding both the identification of a mean  
68 growth mode (e.g. linear or mono-exponential), and on the determination of the fluctuations around this  
69 trend. While the study of mean trends is possible with medium size datasets (hundreds of cells), the study  
70 of fluctuations in growth requires much larger datasets (thousands of cells), which remain difficult to  
71 generate for animal cells. In a previous study<sup>10</sup>, we dynamically measured the volume of single adherent  
72 animal cells using a fluorescence exclusion technique (FXm)<sup>25</sup>. Our results indicated that, on average,  
73 volume growth speed increases with cell volume but the data obtained were not sufficient for deeper  
74 analysis. Here, we report an improvement of the FXm method that produces higher throughput in volume  
75 readouts. We obtained a data set of around 1700 single-cell volume curves of HeLa cells, combined with  
76 the tracking of key cell cycle transitions (birth, G1/S, and mitosis). The data show that volume-specific  
77 growth rate depends on both cell cycle phase and cell volume. Our unprecedented statistical resolution  
78 also allows us to investigate the variability in volume growth and to show that it arises from constant-  
79 amplitude additive fluctuations of growth speed rather than from fluctuations of the specific growth rate.

## 80 81 **Results**

### 82 83 **An improved FXm method produces high-throughput dynamic measurements of single-cell volume**

84 To obtain high-throughput measurements of volume growth of single cells, we improved the  
85 fluorescence-exclusion based measurement (FXm) of cell volume we previously developed<sup>11,25</sup>. Briefly,  
86 this method relies on seeding cells in chambers of known height in the presence of a fluorescent probe  
87 (10 kDa dextran) that does not enter or harm the cell (Figure 1 a-b). Since the cell excludes the dye, the  
88 measured fluorescence in the area containing a cell is negatively proportional to the volume of that cell.

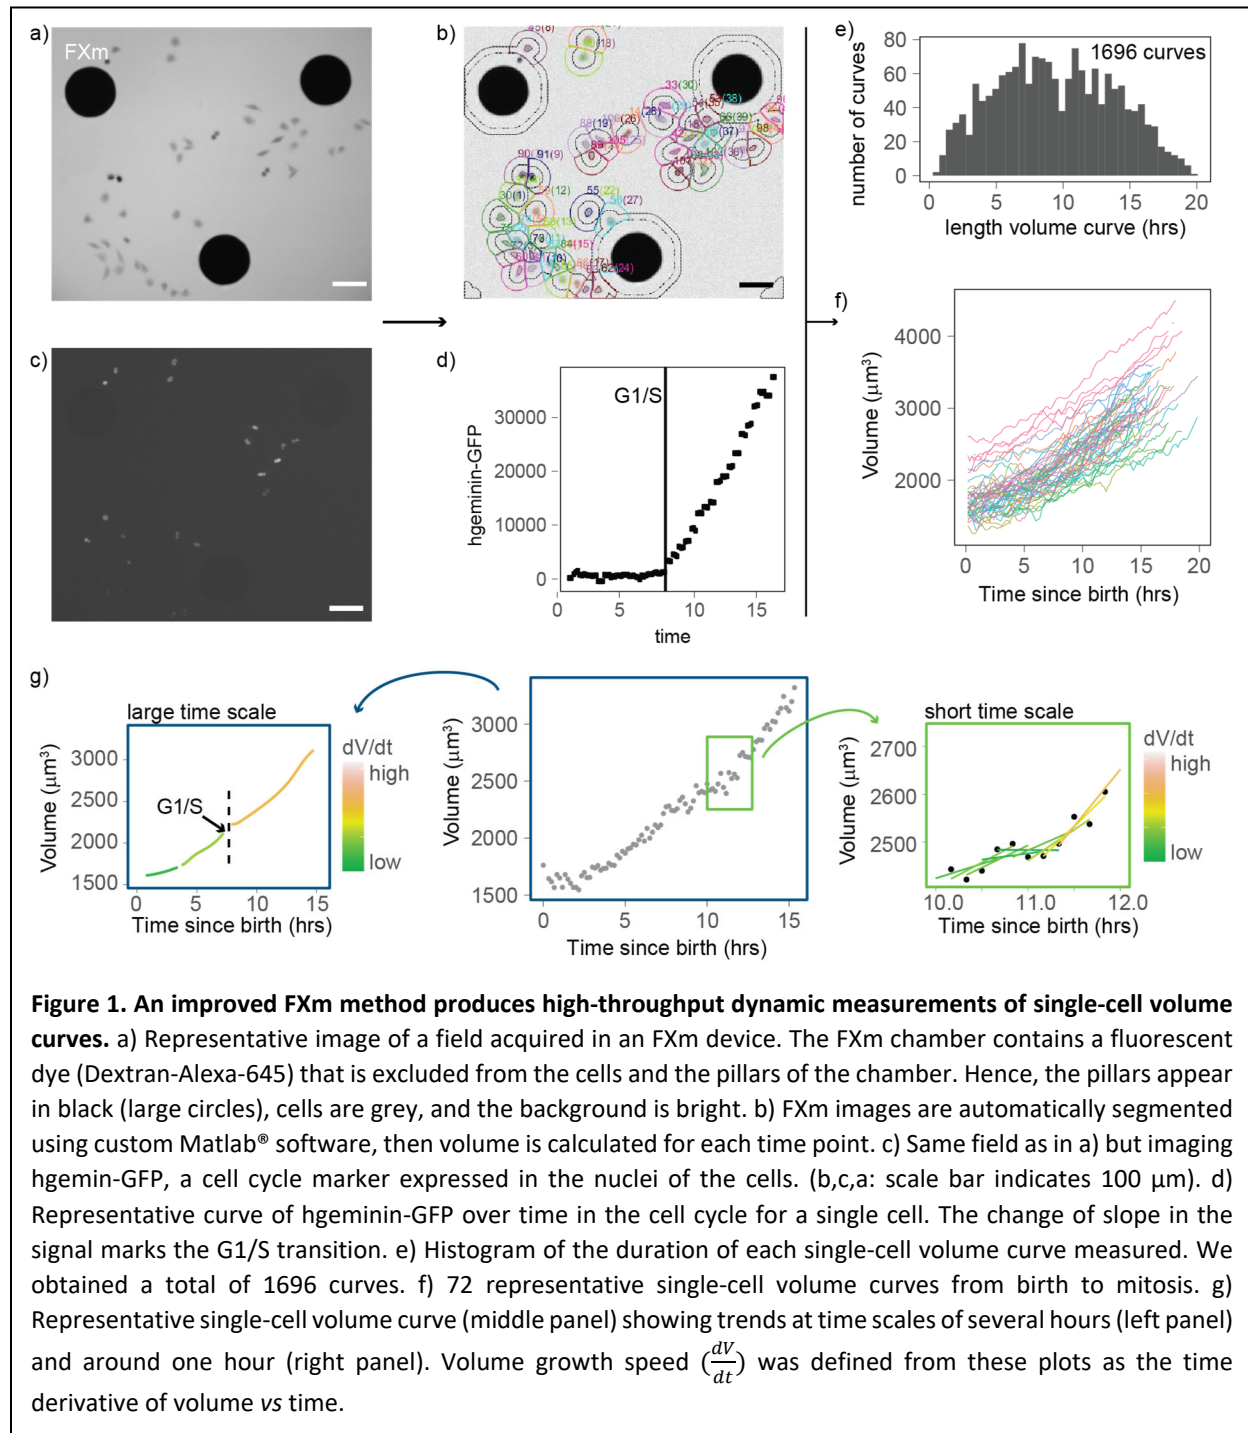

89 We combined these volume measurements with cell cycle phase analysis using the hgeminin-GFP part of  
 90 the FUCCI system<sup>26,27</sup> the expression of which marks S phase entry (Figure 1c). We performed four  
 91 independent 24-hour-long experiments in which we imaged thousands of cells growing asynchronously in  
 92 the FXm chambers (Figure 1 – supplement 1). To extract cell volume through time for each individual cell,  
 93 we developed an automated cell tracking algorithm (Figure 1b) and we verified that the segmentation and  
 94 lineage tracing (recording of mitotic events) were accurate by manual inspection of each single cell trace.  
 95 Birth was defined as the onset of cytokinesis, the G1/S transition was defined as the onset of increase in

96 hgeminin-GFP intensity (Figure 1c) and mitosis was defined as the onset of the mitotic volume  
 97 overshoot<sup>10,11,24</sup>. Using this approach, we obtained 1696 verified single-cell volume trajectories that  
 98 contained all available cell cycle information (time of birth, time of G1/S and/or time of entry into mitosis,  
 99 Figure 1e-f). This high-quality, high-throughput measurement of animal cell volume was used to analyze  
 100 the patterns and regulation of cell volume growth with unprecedented statistical resolution.

### 101 Volume growth is close to exponential for a wide range of volumes

102 First, we considered the growth mode of cells - a central question to understanding both cell growth and  
 103 size homeostasis<sup>28,29</sup>. Typical limit cases are linear or exponential growth. As previously reported for  
 104 adherent cell types<sup>9,10</sup>, single-cell trajectories show highly variable behavior (Figure 1g), making it difficult  
 105 to associate them with any simple behavior. We turned to an alternative method based on population  
 106 averages. We reasoned that, in the case of an average simple exponential growth model, growth speed  
 107 should increase, on average, linearly with volume and the slope  $\alpha$  followed by  $\frac{dV}{dt}$  vs  $V$  (formally the trend  
 108 of a conditional average) can be used to define an average volume-specific growth rate<sup>30</sup>. All four  
 109 experiments consistently showed that, for volumes higher than  $1800 \mu\text{m}^3$  (and lower than  $4000 \mu\text{m}^3$ ),  
 110 growth speed increases on average linearly with volume, with a slope  $\alpha$  that was very close to the  
 111 (unconditional) average of  $\langle 1/V dV/dt \rangle$  (Figure 2a). The agreement of these two different estimates  
 112 supports the idea that average exponential growth describes these data well. All four experiments were

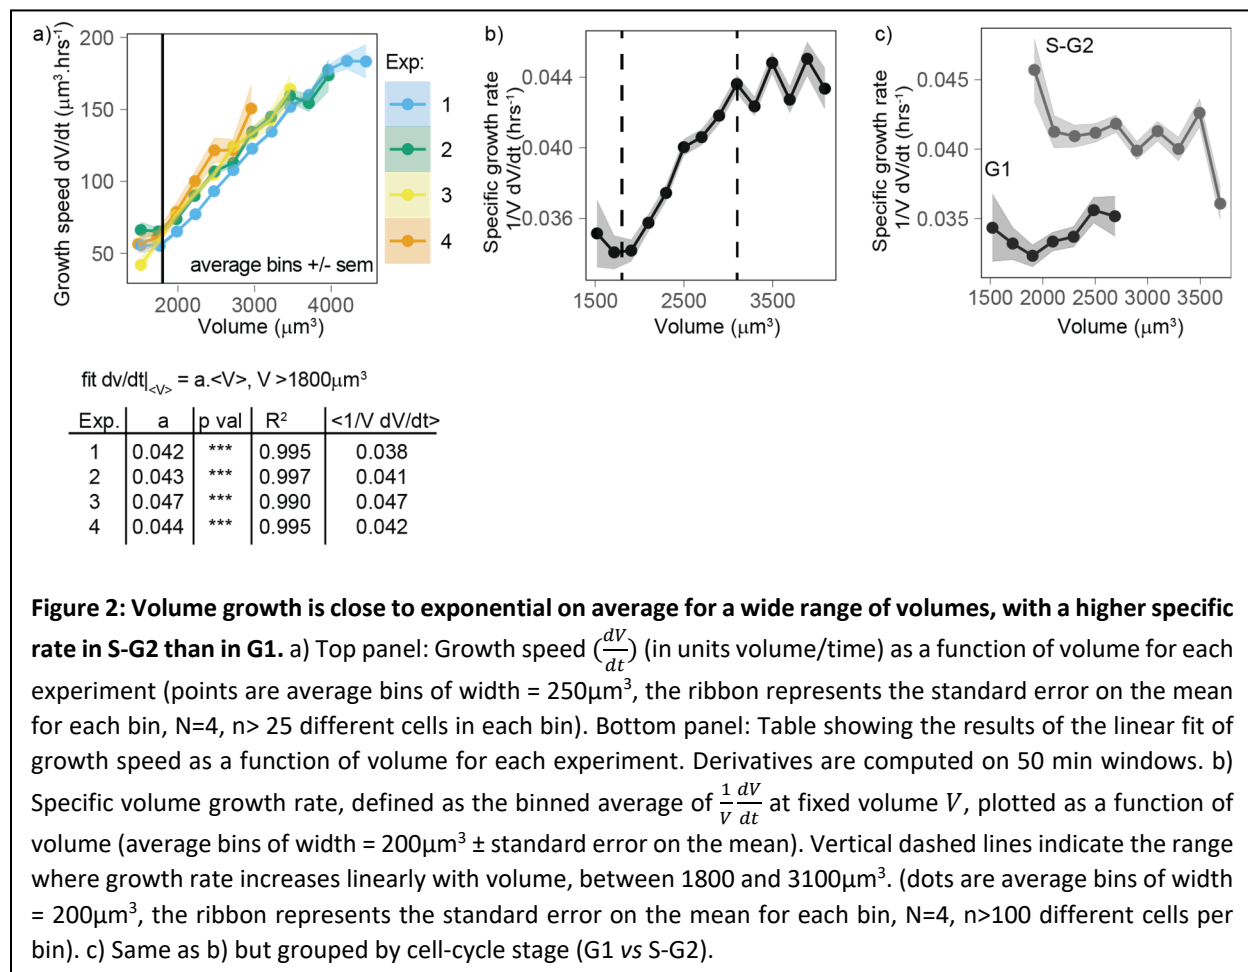

113 also very similar with values of  $\alpha$  ranging from 0.038 to 0.047 h<sup>-1</sup>. Thus, we conclude that volume growth  
114 is faster than linear, and on average close to exponential in this range of cell sizes. Cells with volumes  
115 below 1800  $\mu\text{m}^3$  did not follow the same trend, likely due to a different pattern of growth early in the cell  
116 cycle (see below).

### 117 Specific volume growth rate depends on cell-cycle progression

118 When we considered in more detail an estimated volume-specific growth rate, defined by the conditional  
119 average of  $\frac{1}{V} \frac{dV}{dt}$  vs volume  $V$  (which has units 1/time), as a function of volume, we observed a slight but  
120 significant increase with volume for cells between 1800 and 3100  $\mu\text{m}^3$  (Figure 2b). Outside this range, the  
121 trend is more complex but the robustness of the observed behavior may be limited due to the lower  
122 number of observations at these extreme sizes. We hypothesized that one potential cause of increase in  
123 volume-specific growth rate during the cell cycle could be a cell-cycle stage dependency, which we could  
124 test using data on the transition from G1 to S-G2 phase. To address this question, we repeated the plot of  
125 volume-specific growth rate as a function of volume, also grouping the data by cell cycle phase (G1 vs S-  
126 G2). This analysis shows that estimated volume-specific growth rate is nearly constant with volume for a  
127 given phase, and growth rate in S-G2 is about 15% higher than in G1 (Figure 2c). These results show that  
128 progression from G1 into S/G2 is accompanied by an increase in the volume-specific growth rate.

### 129 Newborn cells show a distinct pattern of volume growth

130 The observation that small cells show a different growth behavior than the rest of the cells (Figure 2a-b)  
131 prompted us to test whether growing cells could follow different patterns early in the cell cycle. We  
132 examined volume growth speed  $\frac{dV}{dt}$  as a function of time from birth for the three experiments that had  
133 more than 80 cells (to ensure that we had enough statistical power, even when analyzing each experiment  
134 separately). In all three experiments, volume growth speed showed a fast increase during the first 1.3  
135 hours after birth and increased more slowly and steadily after that point in time (Figure 3a). This suggests  
136 that during the initial 1.3 hours after birth, cells follow patterns different from those followed during the

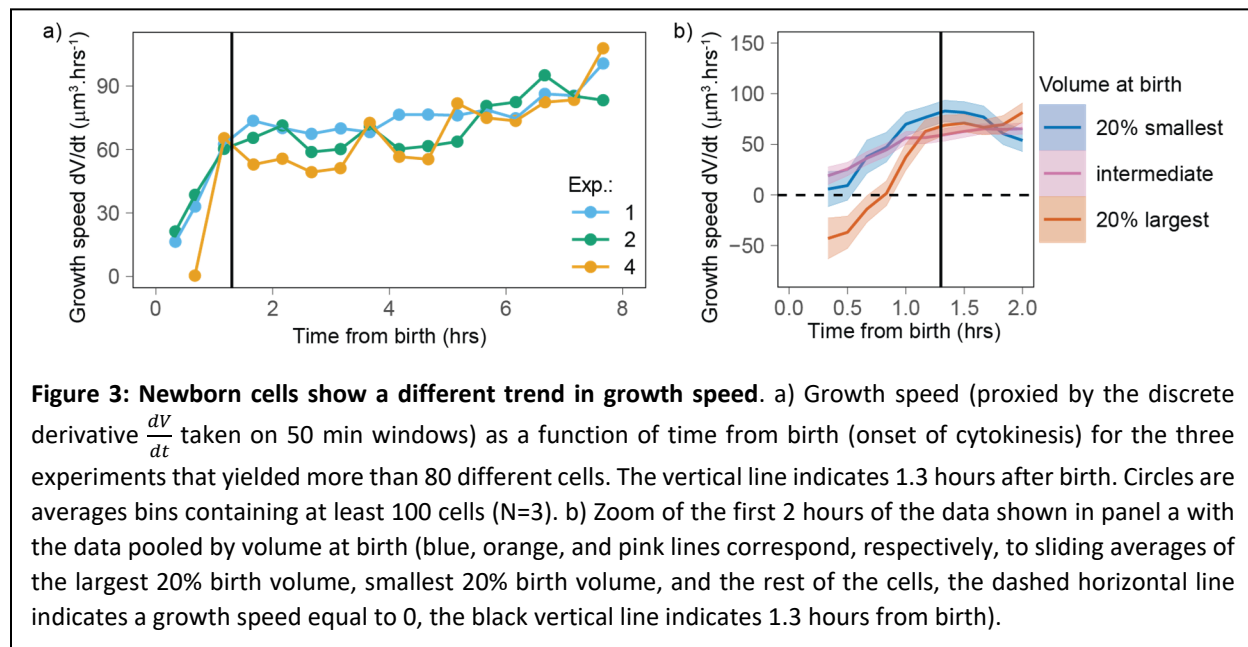

137 rest of the cell cycle. To gain more insight into the details of volume growth during this initial period, we  
 138 pooled the three experiments together and grouped cells by their volume at birth. The largest cells at  
 139 birth started their cell cycle with a negative growth speed (meaning that they were losing volume) during  
 140 the first hour after birth. Small, intermediate, and large cells ultimately converged on the same growth  
 141 speed at 1.3 hours after birth (Figure 3b). We note that in our data, birth is defined as the first time point  
 142 of cytokinesis onset (a process which is then typically completed within 20-30 minutes<sup>10</sup>), thus the 1.3  
 143 hour period comprises the end of cytokinesis as well as early G1 phase. The fact that volume follows a  
 144 distinct pattern early in the cell cycle suggests a different mechanism of volume growth regulation as cells  
 145 re-enter interphase.

#### 146 Volume growth rate fluctuations decrease with cell volume

147 Our analyses so far indicate that, excluding the initial (Figure 3) stage of the cell cycle, volume growth is  
 148 close to exponential for a wide range of volumes (Figure 2a), at a rate that changes with cell-cycle phase  
 149 (Figure 2c). Next, since little is known about the cell-specific variations around this average behavior, we  
 150 set out to evaluate the fluctuations, focusing on the range of volumes for which the growth behavior is  
 151 well characterized (cells between 1800 and 3100  $\mu\text{m}^3$  (Figure 2a) and starting 1.3 hrs after birth (Figure  
 152 3a)). Volume growth is the result of the combination of both biosynthetic pathways that act over the cell  
 153 cycle and homeostatic pathways (that typically act at shorter time scales) that maintain a balance of  
 154 cellular osmosis, hydrostatic pressure, and density<sup>1,31</sup>. We first quantified the variability of volume growth  
 155 by the variance of the specific growth rate, proxied by  $\frac{1}{V} \frac{dV}{dt}$ , for cells grouped in different volume bins, and  
 156 we found that this variance decreases rapidly with the time scale  $dt$  over which one takes the discrete  
 157 derivative (Figure 4a). Hence, the time scale must be specified for a meaningful comparison of the size of  
 158 such fluctuations (for example across different studies). Moreover, we found that, at fixed time scale of  
 159 the discrete derivative, the variance in specific growth rate decreases with volume (Figure 4a). Since this  
 160 observation was robust across all derivative time scales, we decided to focus on the fluctuations of growth  
 161 rate measured at the shortest accessible time scale (50 minutes, corresponding to 5 frames). When we

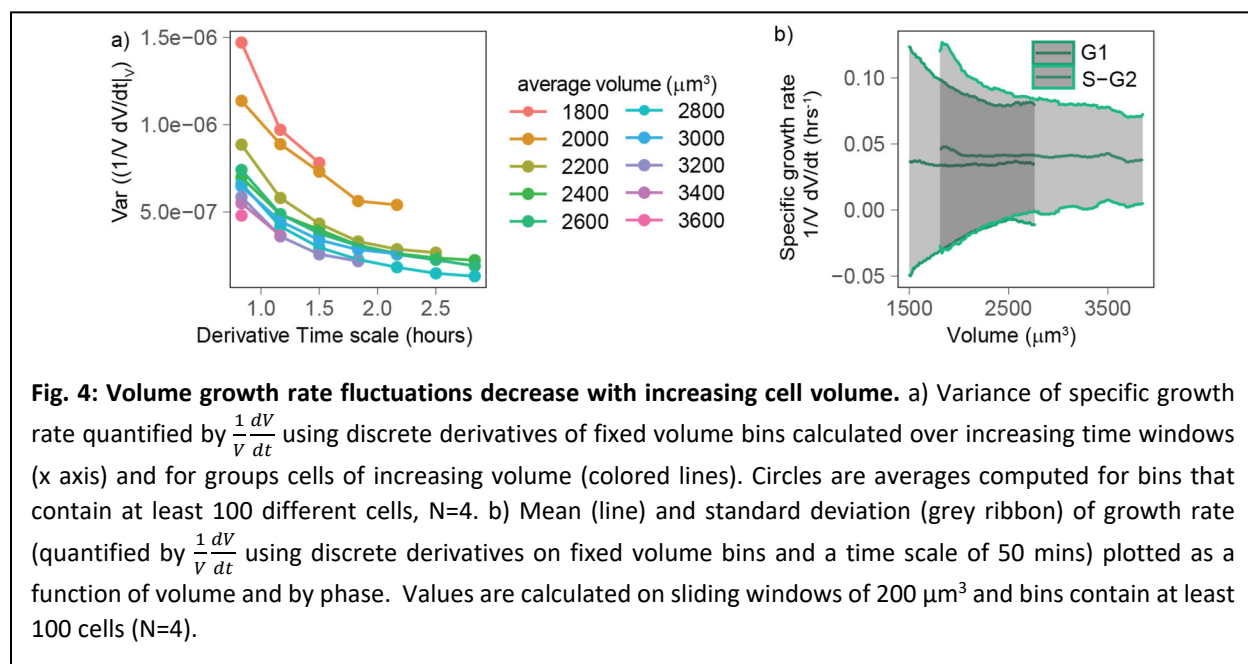

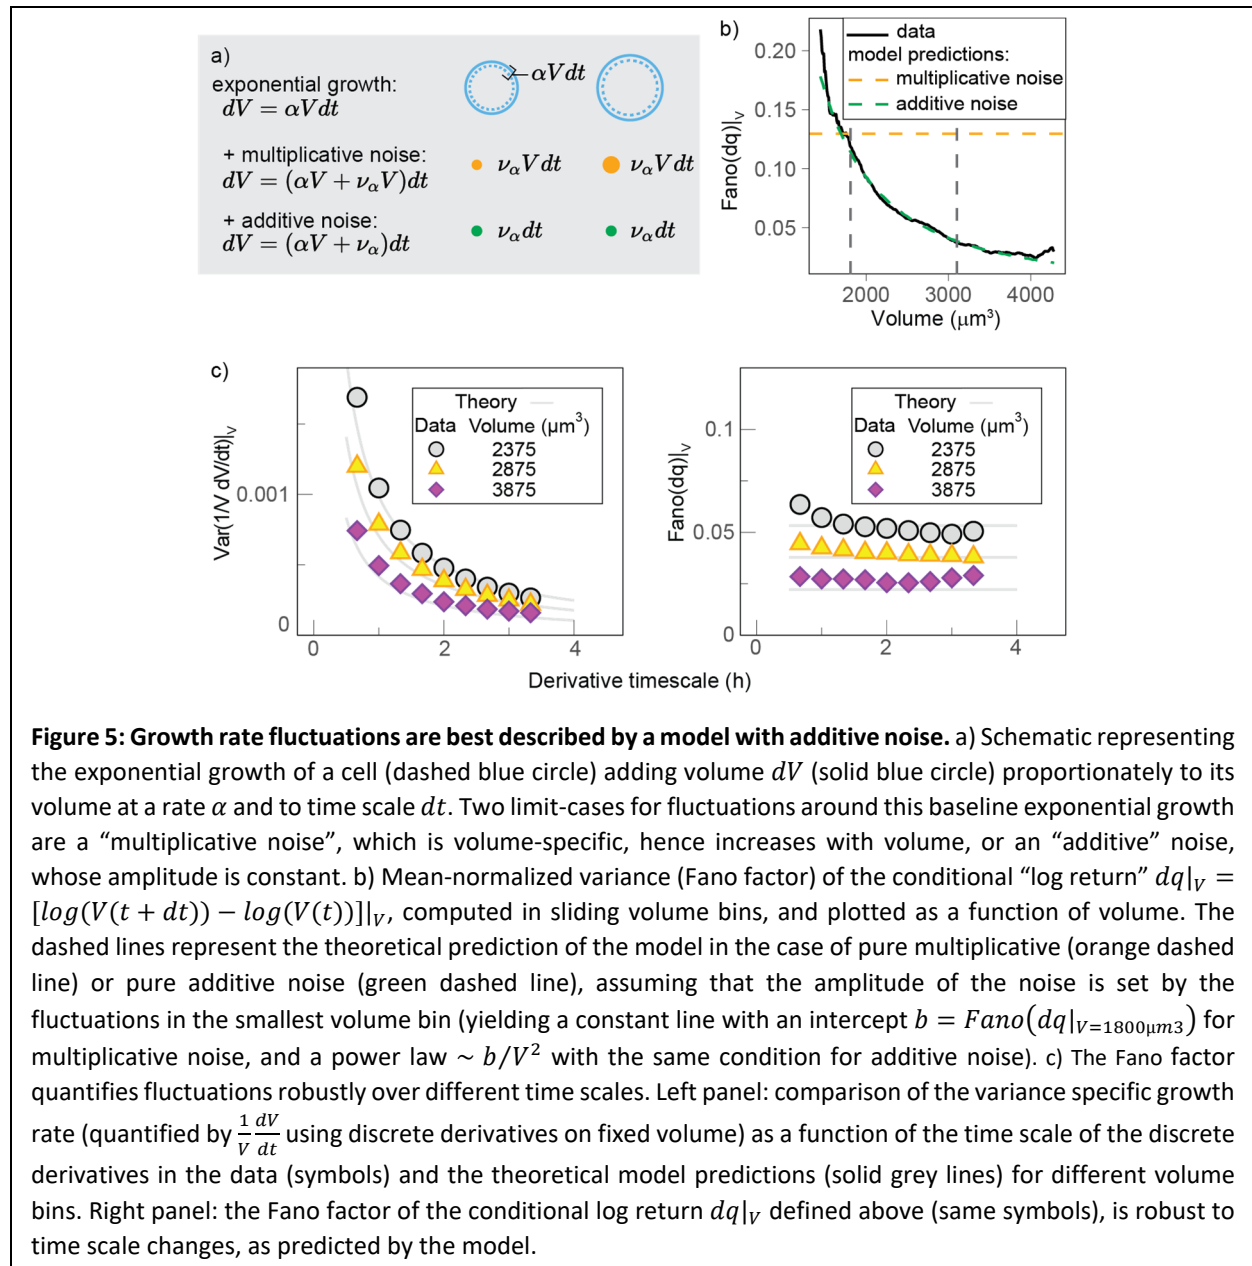

**Figure 5: Growth rate fluctuations are best described by a model with additive noise.** a) Schematic representing the exponential growth of a cell (dashed blue circle) adding volume  $dV$  (solid blue circle) proportionately to its volume at a rate  $\alpha$  and to time scale  $dt$ . Two limit-cases for fluctuations around this baseline exponential growth are a “multiplicative noise”, which is volume-specific, hence increases with volume, or an “additive” noise, whose amplitude is constant. b) Mean-normalized variance (Fano factor) of the conditional “log return”  $dq|_V = [\log(V(t + dt)) - \log(V(t))]|_V$ , computed in sliding volume bins, and plotted as a function of volume. The dashed lines represent the theoretical prediction of the model in the case of pure multiplicative (orange dashed line) or pure additive noise (green dashed line), assuming that the amplitude of the noise is set by the fluctuations in the smallest volume bin (yielding a constant line with an intercept  $b = \text{Fano}(dq|_{V=1800\mu\text{m}^3})$  for multiplicative noise, and a power law  $\sim b/V^2$  with the same condition for additive noise). c) The Fano factor quantifies fluctuations robustly over different time scales. Left panel: comparison of the variance specific growth rate (quantified by  $\frac{1}{V} \frac{dV}{dt}$  using discrete derivatives on fixed volume) as a function of the time scale of the discrete derivatives in the data (symbols) and the theoretical model predictions (solid grey lines) for different volume bins. Right panel: the Fano factor of the conditional log return  $dq|_V$  defined above (same symbols), is robust to time scale changes, as predicted by the model.

162 plotted together the mean and standard deviation of specific growth rate as a function of volume (Figure  
 163 4b), the standard deviation of specific growth rate clearly decreases with volume.

#### 164 **Growth rate fluctuations are dominated by constant noise**

165

166 To better understand the observation of a reduction in growth rate noise with cell volume, we used a  
 167 stochastic mathematical model describing cell growth (see Annex and Figure 4a). This model has a long  
 168 history of applications outside biology<sup>32,33</sup>, but it was recently proposed by Pirjol and colleagues<sup>34</sup> in the  
 169 context of cell growth. The model considers that cells on average grow exponentially and describes  
 170 fluctuations around this mean growth as noise:

171 
$$\frac{dV}{dt} = \alpha V + \nu_\alpha V^\gamma$$

172 where  $\alpha$  is the mean specific growth rate and  $v_\alpha$  is a white noise term. Thanks to the factor  $V^\gamma$ , this  
173 equation interpolates the limit cases of “additive” (constant amplitude) fluctuations and “multiplicative”  
174 (volume-specific) fluctuations (Figure 5a, see also Annex A for details and Figure 5 – supplement 1a for  
175 the validation with simulations). Central to the model is the definition of the parameter  $\gamma$  ( $0 \leq \gamma \leq 1$ ) which  
176 sets the relative weight between two kinds of noise: when  $\gamma = 1$ , we obtain:  $dV/dt = (\alpha + v_\alpha)V$ , and  
177 the model describes multiplicative specific growth rate fluctuations (Figure 5b). These fluctuations are  
178 symmetric with respect to a reference specific growth rate  $\alpha$ , hence they can be interpreted as emerging  
179 from noise in biosynthetic rates (e.g., surface synthesis, protein synthesis, etc.). When  $\gamma = 0$ , the model  
180 describes an additive noise of constant amplitude, acting symmetrically on growth speed  $dV/dt$ , which  
181 can be interpreted as resulting from any of the homeostatic processes that contribute to setting steady  
182 state volume (e.g. homeostatic constraints of biophysical origin on hydrostatic pressure, osmotic  
183 pressure, etc.). The model also allows for intermediate values of  $\gamma$ , which would effectively describe the  
184 combined presence of additive and multiplicative noise sources on growth.

185  
186 An important prediction of the model (Figure 5c) is that the mean-normalized variance of growth rate  
187 (Fano factor) is not dependent on the time scale of the derivative. When we examined our experimental  
188 data, we observed that this was indeed the case (Figure 5c). The Fano factor of growth rate depends on  
189  $\gamma$ , the mean specific growth rate  $\alpha$  and constant  $\sigma$  as follows:

$$190 \quad Fano(dq)|_V = \frac{\sigma^2 V^{2(\gamma-1)}}{\alpha_q(V)}$$

191  
192 Where  $\alpha_q$  is the average log-return rate at fixed volume (see Annex A), and  $dq|_V = [\log(V(t + dt) -$   
193  $\log(V))]|_V$  is a conditional “log return” and quantifies the volume specific growth rate in presence of  
194 possible multiplicative fluctuations. Importantly, other estimators of variability such as variance, SD or CV,  
195 do depend on the time scale of the discrete derivatives, in both the model and the data.

196  
197 We thus decided to use the Fano factor to estimate the variability in growth rate. We found that the Fano  
198 Factor of volume growth rate (measured using the “log return”  $dq$ ) decreased rapidly with volume and  
199 that the trends measured in G1 and S-G2 overlapped well (Figure 5 - Supplement 1b). This suggests that  
200 the decay in volume growth rate variability is independent of cell cycle phase. We thus pooled the two  
201 phases together and compared the decay with our model predictions (Figure 5b). Comparison of the  
202 model predictions for the two extreme cases ( $\gamma = 1$  and  $\gamma = 0$ ) and the data shows that the data are very  
203 close to a scenario where  $\gamma \approx 0$  and fluctuations are almost entirely additive (Figure 5b). Such additive  
204 noise could arise from an extrinsic additive noise on volume measurement. To estimate the noise on  
205 volume measurement, we compared the fluctuations on the detrended volume curves of cells and  
206 neighboring background areas of same surface area (Figure 5 - supplement 2 a-b). The standard deviation  
207 of the fluctuations was 3-4 times larger for cells than for the background areas, showing that fluctuations  
208 of biological origins dominate over fluctuations of technical noise origin (Figure 5 -supplement 2c). Overall,  
209 this analysis suggests that volume fluctuations come principally from a constant-amplitude noise in  
210 instantaneously added volume, rather than from random variations of the volume-specific growth rate  
211 itself.

## 212 213 **Discussion:**

214 Most recent studies on animal cell growth have considered the patterns of dry or buoyant mass<sup>9,35</sup>. Here,  
215 we complement this knowledge by providing a high-throughput dataset of volume trajectories in adhering  
216 cells allowing us to compare the behavior of these different parameters.



217 During the first 1.3 hours following birth, volume growth displays a pattern where cells of intermediate  
218 and small volume grow slowly while larger cells at birth lose volume. This is very different from the mass  
219 pattern previously reported<sup>23</sup>. Our volume curves exclude the period in mitosis where cell volume  
220 transiently increase by 10-30% in volume called the mitotic volume overshoot<sup>11,24</sup>. This 1.3 hours period  
221 also spans both the period of completion of cytokinesis and the beginning of G1 phase, ruling out the  
222 hypothesis that mitosis alone determines the early volume growth pattern. Our observations instead  
223 point to the existence of a previously overlooked period early in the cell cycle where several processes  
224 such as the change in cell shape due to the spreading of the cell after mitotic rounding<sup>36,37</sup>, and the onset  
225 of cell growth in early G1 compete to determining volume growth. It is possible that this period also  
226 corresponds to an extreme case where volume and mass growth rate, which are very different during  
227 mitosis<sup>11,23,24</sup>, progressively ‘tune in’ before they reach a common steady behavior.

228 Throughout the cell cycle, mass growth has been reported to oscillate periodically in HeLa cells<sup>9,35</sup>. We  
229 find that this phenomenon is not simply reflected by cell volume. We found some oscillations in volume  
230 growth speed as a function of time from birth only in birth volume outliers, and not matching the period  
231 and amplitude of the mass oscillations reported previously.<sup>9,35</sup> (Figure 3 – Supplement 1). This finding  
232 suggests that dry-mass biosynthesis and volume growth, while being interrelated, can be independent in  
233 specific phases of the cell cycle. Studies combining measurements of cell shape, mass, and volume at high  
234 time resolution will be particularly important to clarify the complex interplay between these parameters.

235 The high number of curves in our study allows us to investigate systematically the fluctuations in volume  
236 growth. Our observation that volume growth shows additive fluctuations counters the idea that the  
237 volume specific growth rate itself fluctuates (Figure 5a-b). What could be the origin of such additive noise  
238 and how can we explain the absence of noise on the rate itself? Our controls show that extrinsic  
239 experimental noise only minimally contributes to the additive fluctuations we measure (Figure 5 –  
240 Supplement 2). Intrinsic sources of additive fluctuation could arise from noise in the processes involved  
241 in volume regulation. Cell volume is a physical parameter that results from an equilibrium of cell  
242 hydrostatic pressure, osmolarity and membrane tension at time scales of minutes to hours<sup>1</sup> and much less  
243 understood mechanisms that maintain cell density<sup>31,38–41</sup> by coupling mass and volume at timescales of  
244 several hours. In a scenario where volume is unidirectionally coupled to mass, even if mass growth rate is  
245 noisy<sup>42</sup>, one could potentially obtain an apparent<sup>42</sup> volume growth rate with fluctuations that are only due  
246 to the coupling. None of the available studies considering cell mass has addressed the question of whether  
247 mass biosynthesis fluctuations are themselves mass specific.

248 Finally, our analysis shows that growth-rate variability, quantified by variance, SD, or CV, is strongly  
249 dependent on the time scale used to evaluate discrete derivatives (Figure 4a, Figure 5c). This result poses  
250 an important caveat for the quantitative comparison of growth rate fluctuations across different studies,  
251 as absolute values of growth rate fluctuations evaluated in different ways and on different time scales (or  
252 smoothing windows) may strongly differ. In general, single-cell growth studies are currently limited by the  
253 development of theoretical tools that could quantify the contribution of the different determinants of  
254 growth such as size, time, and cell cycle phase that act at different time scales. These tools, together with  
255 experimental approaches that allow the combined measurement of several size parameters (mass,  
256 volume) concomitantly are needed to further elucidate the growth patterns of animal cells.

257

258 **Materials and Methods**

259 **Cell line and cell culture.**

260 HeLa cells expressing hgemin-GFP were a kind gift from Buzz Baum's lab (UCL, London, United Kingdom).  
261 Cells were cultured in DMEM-Glutamax media and imaged in DMEM without phenol red, supplemented  
262 with Glutamax. Both media were supplemented with 10% FBS and 1 % penicillin-streptomycin.

263

264 **Volume measurement with FXm**

265 The detailed protocol for FXm is described previously<sup>25</sup> and the design is described in ref.<sup>10</sup>. Briefly,  
266 measurement chambers were replicated in PDMS (crosslinker:PDMS, 1:10). To prevent leakage of the  
267 fluorescent dextran from the chamber, 4mm high PDMS cubes were stuck on top of the inlets before  
268 punching 2mm diameter holes for every inlet. The chamber was then irreversibly bound to the 35 mm  
269 diameter glass-bottom fluorodishes<sup>®</sup> by plasma treatment, coated with fibronectin 50 ( $\mu\text{g}.\text{mL}^{-1}$ ), for about  
270 30 min, then rinsed and incubated in phenol-free media overnight. To ensure that cells were in a similar  
271 growth phase when starting an experiment, cells were seeded at constant density ( $1.9 \times 10^4 \times \text{cm}^{-2}$ ) two days  
272 prior to the experiment. The day of the experiment, cells were detached by incubating with EDTA for 15-  
273 20 min, recovered and seeded at intermediate density in the measurement chamber (Figure 1a). 4 hours  
274 after seeding, the media was replaced with equilibrated media containing 1  $\text{mg}.\text{mL}^{-1}$  of 10 kDa Dextran  
275 Alexa-645. Imaging started 2-4 hours after changing the media. While imaging, cells were kept at 37°C  
276 with 5% CO<sub>2</sub> atmosphere. Imaging was performed on an inverted epifluorescence microscope (Ti inverted  
277 (Nikon) or DMI8 inverted (Leica)) equipped with a LED excitation source. Images were acquired with a  
278 CoolSnap HQ2 camera (Photometrics) or an ORCA-FLASH4.0 camera (Hamamatsu). Images were  
279 obtained using a low magnification (10X), low numerical aperture objective (NA=0.3, phase) every 10 min  
280 (FXm measurement) and 30 min (hgeminin-GFP imaging).

281

282 **Software analysis**

283 To extract cell volume and cell cycle information from the images we used a custom-made Matlab  
284 software<sup>25</sup>. The software contained an image analysis algorithm previously optimized<sup>25</sup> that performed  
285 successive image treatments to normalize the background intensity and correct for background  
286 inhomogeneity (for example due to an inhomogeneous light source). The algorithm then segmented the  
287 pillars and background to calibrate the fluorescence intensity signal using: (i) the average background  
288 intensity to calculate  $I_{max}$ , (ii) the average intensity under the pillars in the chamber to calculate  $I_{min}$   
289 and (iii) the known height of the chamber. The software then segmented and tracked single cells (Figure  
290 1b) throughout the duration of the movie. If a cell divided, the event was recorded and the lineage tree  
291 for that cell recorded. Finally, the cell volume and hgeminin-GFP intensity was calculated over the  
292 segmented area for each cell and each movie frame.

293

294 The background normalization algorithm required the user to manually set several parameters. To ensure  
295 that these parameters were accurately chosen, a graphical user interface allowed the user to visualize the  
296 results of the image treatment given a set value for each parameter and assess its validity. This allowed,  
297 after a few trial and errors, setting a set of parameter values that were optimal for each set of movies  
298 obtained in the same FXm chamber. There were four steps to set these parameter values. First, to detect  
299 the pillars and later calculate  $I_{min}$ , the user manually set a threshold that segmented the pillars (from 0  
300 to 1 on a normalized image), the user also set a 'distance of influence' around each pillar which consisted  
301 in an area larger than the pillar where cell volume would not be calculated to prevent potential artefacts  
302 of volume calculation due to a shadow caused by the pillars (see ref.<sup>25</sup>). Second, to estimate the  
303 background and later calculate  $I_{max}$ , the user chose a threshold to detect the cells (from 0 to 1 on a  
304 normalized image) and set the parameter called 'noise factor'. Third, using these parameter values, the  
305 image treatment algorithm was applied to the image. Fourth, on the resulting renormalized image, the

306 user set the parameter values for cell segmentation and tracking: the average size of the mask and the  
307 threshold value to detect the cell, the maximum moving distance for a cell from one image to the next,  
308 the radius around each detected cell (to prevent measuring cells that were too close to each other), the  
309 minimum cell size and a parameter 'sigma' that represented a threshold allowing splitting of an object  
310 into two distinct object (for example after cell division or when two cells are near each other).

311  
312 During the optimization phase of the analysis pipeline, we re-ran the analysis on the same movies using  
313 different parameter values to test the robustness of the volume calculated to variabilities in user-defined  
314 parameter values. The volume curves obtained were very similar and indicated that errors in volume  
315 measurement due to variability in parameter settings were negligible. Once the algorithm parameters  
316 were set, the software processed hundreds of movies in batch mode using parallel processing to increase  
317 the speed of processing. The analysis of a set of movies coming from one experiment took 2 to 3 full days  
318 of computer processing. At the end of this step, we obtained hundreds of movies showing the tracking  
319 results (Figure 1c). Each movie was then visually checked to correct any errors of segmentation.

320

### 321 **Visual assessment and manual curation of the single cell tracks**

322 Each single-cell trajectory was visually checked. We verified that the segmentation and lineage tracing  
323 (recording of mitotic events) were accurate. During this manual curation, we visually assessed and noted,  
324 for each cell: (i) potential frames when the volume calculated should be excluded from the analysis due  
325 to a segmentation error, (ii) if the cell divided, the frame when the cell started rounding and the frame  
326 when the first evidence of cytokinesis occurred. We also checked for and corrected mistakes in the lineage  
327 tracking. For the first experiment analyzed, we also noted any frames where a cell was near another cell  
328 (typically right after birth when the two daughter cells are near each other or later when two cells bump  
329 into each other). We then checked that the presence of a neighboring cell was not affecting the volume  
330 curve in an obvious way. Since it did not, we stopped tracking this information for the subsequent  
331 experiments. This visual assessment and manual curation, although time consuming, was essential to our  
332 analysis because it increased our confidence that any fluctuation seen on the resulting volume curve was  
333 not due to an identifiable artefact. The resulting volume curves and hgeminin-GFP signal were then  
334 imported into R. Using a graphical user interface, each curve was plotted and the user manually selected,  
335 for each cell: (i) the beginning and the end of the mitotic volume overshoot<sup>10,11,24</sup> on the volume curve and  
336 (ii) the point of increase in hgeminin-GFP intensity indicating G1/S transition (Figure 1d).

337

### 338 **Volume curve smoothing and calculation of growth speed**

339 To then get into the analysis of volume growth speed and growth rate fluctuations, we developed a  
340 cleaning and algorithm that would filter out the clear outliers and smooth fluctuations that are within the  
341 noise of our measurement technique. Several algorithms were tested, each time checking visually the  
342 resulting comparison of the raw volume measurement with the smoothed, filtered curve. The final  
343 algorithm selected worked in two steps. First, to filter out clear outliers, a histogram of values on sliding  
344 windows of 11 frames was established and the fourth quantile ( $Q_4$ ) and interquartile range ( $IQR$ ) of that  
345 distribution were calculated. Then, points that were above or below  $Q_4 \pm 0.9 * IQR$  were removed from  
346 the volume curves. Second, a smoothing algorithm based on centered averages on sliding windows of 3  
347 frames was applied. To calculate growth speed ( $\frac{dV}{dt}$ ), local robust linear fits of single cell volume curves as  
348 a function of time were performed on sliding windows of 5 frames (all figures except Figure 4a where the  
349 fits were performed on increasingly long windows of time). The slope coefficient of the fit corresponds to  
350 the instantaneous growth speed. We compared this approach to calculating the discrete time derivative  
351 by plotting the resulting local fits from both methods and visually concluded that the robust linear fit  
352 method gave a more faithful representation of the curve fluctuations.

353

354 **Model and simulations**

355 The model and analytical calculations to estimate cell-to-cell variability are presented in Annex A. These  
356 calculations were compared with simulations based on a discrete-time realization of the Langevin  
357 equation defining the model (See Figure 5 - supplement 1).

358

359 **Statistical analysis**

360 All figure generation and statistical analysis was performed in R. Packages used were 'ggplot2', 'gridExtra',  
361 and 'robustbase'.

362

363

364 **Authors contributions**

365 C.C. and M.P. designed the experiments, C.C. and M.C.L. designed the data analysis, C.C. performed  
366 experiments and data analysis, M.C.L. and C.C. worked on model and simulations, and performed model-  
367 related data analysis. C.C., M.C.L. and M.P. wrote the paper.

368

369 **Acknowledgements**

370 Part of this work was carried out at the Aspen Center for Theoretical Physics. The experiments were  
371 performed at the Institut Pierre-Gilles de Gennes (IPGG) and the Institut Curie. C.C. would like to thank  
372 the imaging platform from the Institut Curie PICT-IBISA and the IPGG, and James Utterback for advice on  
373 the simulations. The authors would like to thank Teemu Miettinen, Ethan Levien, Orso Maria Romano  
374 Ludovico Calabrese and Gabriele Micali for helpful conversations, and Matthew Swaffer and Helena  
375 Cantwell for comments on the manuscript. MCL was funded by the Italian Association for Cancer Research  
376 AIRC-IG (REF: 23258)

377

378 **Competing interest**

379 The authors declare no financial and non-financial competing interests.

380

381 **Software**

382 Matlab® (MathWorks, Natick, Massachusetts, USA) was used for the image analysis (version R2018a or  
383 later).

384

385

386

387

388

389 **Supplementary figures**

390

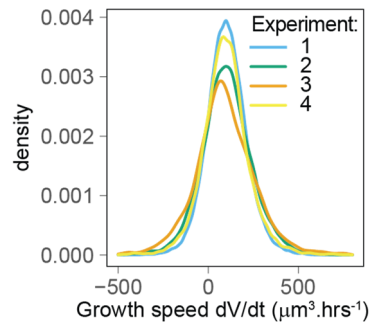

391

392 **Figure 1 – supplement 1: The distributions of growth speed show good agreement between the 4 experimental**  
393 **replicates.** Experiment 1: mean $\pm$ SD=102 $\pm$ 111  $\mu\text{m}^3 \cdot \text{h}^{-1}$ , n=50708; experiment 2: mean $\pm$ SD=102 $\pm$ 142  $\mu\text{m}^3 \cdot \text{h}^{-1}$ ,  
394 n=23739; experiment 3: mean $\pm$ SD=101 $\pm$ 196  $\mu\text{m}^3 \cdot \text{h}^{-1}$ , n=4570; experiment 4: mean $\pm$ SD=96 $\pm$ 138  $\mu\text{m}^3 \cdot \text{h}^{-1}$ , n=12494.

395

396

397

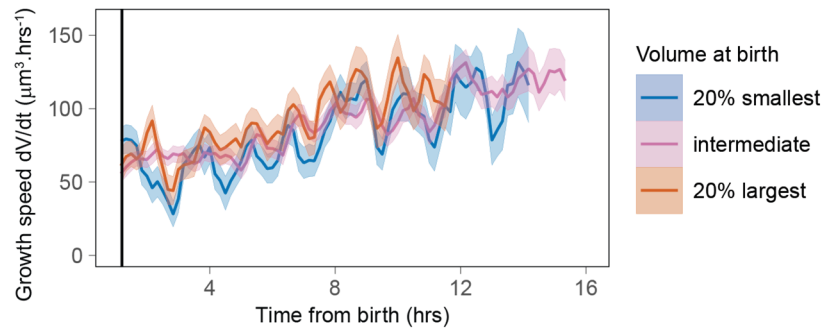

398

399 **Figure 3 - supplement 1: Growth speed as a function of time from birth shows time periodicity for the largest and**  
400 **smallest cells at birth.** The solid lines represent averages (each bin contains at least 100 cells) and the ribbon the  
401 standard error on the mean. Black vertical line indicates 1.3 hours after birth (N=4).

402

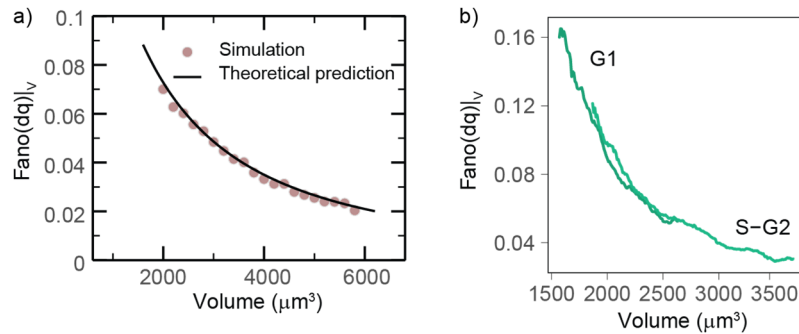

403

404 **Figure 5 – supplement 1: Validation of the model.** a) Theoretical model predictions agree with direct simulations of  
405 the stochastic exponential growth model. The plot compares simulations (circles) with the theoretical predictions  
406 (lines) for the Fano factor of the conditional log return (the logarithmic size increment at fixed volume) from the  
407 same set of parameters. Model parameters were derived from a fit of the pulled experimental data from  
408 experiments 1 and 2 in the volume range 1800-4000  $\mu\text{m}^3$ :  $\alpha=0.038.\text{h}^{-1}$ ,  $\sigma = 41.5(\mu\text{m}^3)^{1-\nu}.\text{h}^{-(1/2)}$ ,  $\nu=0.12$ . b) Mean-  
409 normalized variance (Fano factor) of the conditional “log return”  $dq|_V = [\log(V(t + dt)) - \log(V(t))]|_V$ ,  
410 computed in sliding volume bins, and plotted as a function of volume and phase.

411

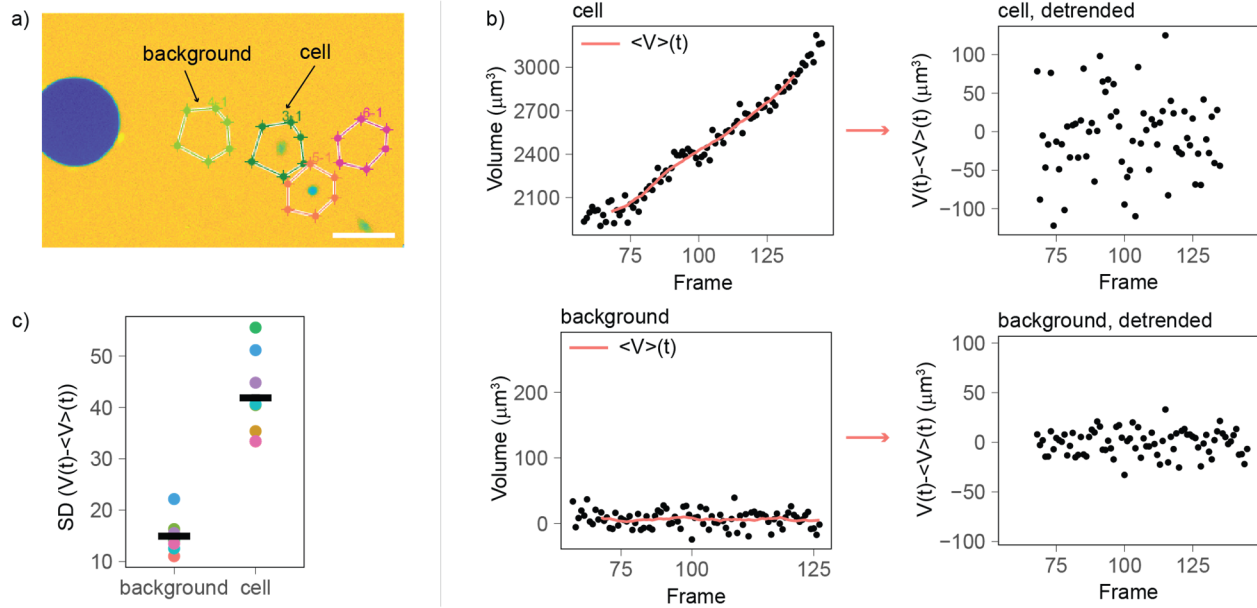

412

413 **Figure 5 – supplement 2: Comparison of the volume fluctuations on cells (biological fluctuations) and background**  
414 **areas (measurement noise).** a) Image of the volume analysis software showing two cells and two background areas  
415 of same surface area (scale bar: 100  $\mu\text{m}$ ). b) Left: For each cell and background area, volume was calculated over  
416 time, and an average volume trend computed over sliding windows of 10 frames was calculated (solid red line).  
417 Right: the average volume trend was subtracted from the volume curve to obtain a detrended volume curve. c) To  
418 estimate the volume fluctuations around the mean detrended curves, the standard deviation was calculated for each  
419 cell (6 total) and corresponding background areas (colors of the dots correspond to a pair of cell and matching  
420 background area). The volume fluctuations measured for cells are about 3-4 times higher than those measured on  
421 background areas, suggesting that fluctuations of biological noise origin dominate of fluctuations of technical noise  
422 origin.



423

424 **References**

- 425 1. Cadart, C., Venkova, L., Recho, P., Lagomarsino, M. C. & Piel, M. The physics of cell-size regulation  
426 across timescales. *Nat. Phys.* (2019) doi:10.1038/s41567-019-0629-y.
- 427 2. Lloyd, A. C. The regulation of cell size. *Cell* **154**, 1194–205 (2013).
- 428 3. Goranov, A. I. & Amon, A. Growth and division--not a one-way road. *Curr. Opin. Cell Biol.* **22**, 795–  
429 800 (2010).
- 430 4. Godin, M., Delgado, F. F., Son, S., Grover, W. H., Andrea, K., Tzur, A., Jorgensen, P., Payer, K.,  
431 Grossman, A. D., Marc, W. & Manalis, S. R. Using buoyant mass to measure the growth of single  
432 cells. **7**, 387–390 (2010).
- 433 5. Son, S., Tzur, A., Weng, Y., Jorgensen, P., Kim, J., Kirschner, M. W. & Manalis, S. R. Direct  
434 observation of mammalian cell growth and size regulation. *Nat. Methods* **9**, 910–2 (2012).
- 435 6. Park, K., Millet, L. J., Kim, N., Li, H., Jin, X., Popescu, G., Aluru, N. R., Hsia, K. J. & Bashir, R.  
436 Measurement of adherent cell mass and growth. *Proc. Natl. Acad. Sci. U. S. A.* **107**, 20691–6  
437 (2010).
- 438 7. Mir, M., Wang, Z., Shen, Z., Bednarz, M., Bashir, R., Golding, I., Prasanth, S. G. & Popescu, G.  
439 Optical measurement of cycle-dependent cell growth. *Proc. Natl. Acad. Sci. U. S. A.* **108**, 13124–9  
440 (2011).
- 441 8. Sung, Y., Tzur, A., Oh, S., Choi, W., Li, V., Dasari, R. R., Yaqoob, Z. & Kirschner, M. W. Size  
442 homeostasis in adherent cells studied by synthetic phase microscopy. *Proc. Natl. Acad. Sci. U. S.*  
443 *A.* **110**, 16687–92 (2013).
- 444 9. Liu, X., Oh, S., Peshkin, L. & Kirschner, M. W. Computationally enhanced quantitative phase  
445 microscopy reveals autonomous oscillations in mammalian cell growth. *Proc. Natl. Acad. Sci.* **117**,  
446 27388–27399 (2020).
- 447 10. Cadart, C., Monnier, S., Grilli, J., Sáez, P. J., Srivastava, N., Attia, R., Terriac, E., Baum, B.,  
448 Cosentino-Lagomarsino, M. & Piel, M. Size control in mammalian cells involves modulation of  
449 both growth rate and cell cycle duration. *Nat. Commun.* **9**, 3275 (2018).
- 450 11. Zlotek-Zlotkiewicz, E., Monnier, S., Cappello, G., Le Berre, M. & Piel, M. Optical volume and mass  
451 measurements show that mammalian cells swell during mitosis. *J. Cell Biol.* **211**, 765–774 (2015).
- 452 12. Horváth, A., Rácz-Mónus, A., Buchwald, P. & Sveiczler, Á. Cell length growth in fission yeast: An  
453 analysis of its bilinear character and the nature of its rate change transition. *FEMS Yeast Res.* **13**,  
454 635–649 (2013).
- 455 13. Cooper, S. *Schizosaccharomyces pombe* grows exponentially during the division cycle with no  
456 rate change points. *FEMS Yeast Res.* **13**, 650–8 (2013).
- 457 14. Di Talia, S., Skotheim, J. M., Bean, J. M., Siggia, E. D. & Cross, F. R. The effects of molecular noise  
458 and size control on variability in the budding yeast cell cycle. *Nature* **448**, 947–51 (2007).
- 459 15. Wang, P., Robert, L., Pelletier, J., Dang, W. L., Taddei, F., Wright, A. & Jun, S. Robust growth of  
460 *Escherichia coli*. *Curr. Biol.* **20**, 1099–1103 (2010).
- 461 16. Kafri, R., Levy, J., Ginzberg, M. B., Oh, S., Lahav, G. & Kirschner, M. W. Dynamics extracted from  
462 fixed cells reveal feedback linking cell growth to cell cycle. *Nature* **494**, 480–483 (2013).
- 463 17. Ginzberg, M. B., Chang, N., D'Souza, H., Patel, N., Kafri, R. & Kirschner, M. W. Cell size sensing in  
464 animal cells coordinates anabolic growth rates and cell cycle progression to maintain cell size  
465 uniformity. *Elife* **7**, e26947 (2018).
- 466 18. Mu, L., Kang, J. H., Olcum, S., Payer, K. R., Calistri, N. L., Kimmerling, R. J., Manalis, S. R. &  
467 Miettinen, T. P. Mass measurements during lymphocytic leukemia cell polyploidization decouple  
468 cell cycle- and cell size-dependent growth. *Proc. Natl. Acad. Sci.* **117**, 15659–15665 (2020).
- 469 19. Kesavan, S. V., Momey, F., Cioni, O., David-Watine, B., Dubrulle, N., Shorte, S., Sulpice, E., Freida,  
470 D., Chalmond, B., Dinten, J. M., Gidrol, X. & Allier, C. High-throughput monitoring of major cell

- 471 functions by means of lensfree video microscopy. *Sci. Rep.* **4**, 5942 (2014).
- 472 20. Son, S., Stevens, M. M., Chao, H. X., Thoreen, C., Hosios, A. M., Schweitzer, L. D., Weng, Y., Wood,  
473 K., Sabatini, D., Vander Heiden, M. G. & Manalis, S. Cooperative nutrient accumulation sustains  
474 growth of mammalian cells. *Sci. Rep.* **5**, 17401 (2015).
- 475 21. Raj, A., Peskin, C. S., Tranchina, D., Vargas, D. Y. & Tyagi, S. Stochastic mRNA synthesis in  
476 mammalian cells. *PLoS Biol.* **4**, 1707–1719 (2006).
- 477 22. Padovan-Merhar, O., Nair, G. P., Biaesch, A. G., Mayer, A., Scarfone, S., Foley, S. W., Wu, A. R.,  
478 Churchman, L. S., Singh, A. & Raj, A. Single Mammalian Cells Compensate for Differences in  
479 Cellular Volume and DNA Copy Number through Independent Global Transcriptional  
480 Mechanisms. *Mol. Cell* **58**, 339–352 (2015).
- 481 23. Miettinen, T. P., Kang, J. H., Yang, L. F. & Manalis, S. R. Mammalian cell growth dynamics in  
482 mitosis. *Elife* **8**, (2019).
- 483 24. Son, S., Kang, J. H., Oh, S., Kirschner, M. W., Mitchison, T. J. & Manalis, S. Resonant microchannel  
484 volume and mass measurements show that suspended cells swell during mitosis. *J. Cell Biol.* **211**,  
485 757–763 (2015).
- 486 25. Cadart, C., Zlotek-Zlotkiewicz, E., Venkova, L., Thouvenin, O., Racine, V., Le Berre, M., Monnier, S.  
487 & Piel, M. Fluorescence eXclusion Measurement of volume in live cells. in *Methods in Cell Biology*  
488 vol. 139 103–120 (2017).
- 489 26. Sakaue-Sawano, A., Kurokawa, H., Morimura, T., Hanyu, A., Hama, H., Osawa, H., Kashiwagi, S.,  
490 Fukami, K., Miyata, T., Miyoshi, H., Imamura, T., Ogawa, M., Masai, H. & Miyawaki, A. Visualizing  
491 Spatiotemporal Dynamics of Multicellular Cell-Cycle Progression. *Cell* **132**, 487–498 (2008).
- 492 27. Sakaue-Sawano, A., Hoshida, T., Yo, M., Takahashi, R., Ohtawa, K., Arai, T., Takahashi, E., Noda, S.,  
493 Miyoshi, H. & Miyawaki, A. Visualizing developmentally programmed endoreplication in  
494 mammals using ubiquitin oscillators. *Development* **140**, 4624–4632 (2013).
- 495 28. Schmoller, K. M. The phenomenology of cell size control. *Curr. Opin. Cell Biol.* **49**, 53–58 (2017).
- 496 29. Zatulovskiy, E. & Skotheim, J. M. On the Molecular Mechanisms Regulating Animal Cell Size  
497 Homeostasis. *Trends in Genetics* vol. 36 360–372 (2020).
- 498 30. Cadart, C., Venkova, L., Recho, P., Lagomarsino, M. C. & Piel, M. The physics of cell-size regulation  
499 across timescales. *Nat. Phys.* (2019) doi:10.1038/s41567-019-0629-y.
- 500 31. Neurohr, G. E. & Amon, A. Relevance and Regulation of Cell Density. *Trends Cell Biol.* **30**, 213–225  
501 (2020).
- 502 32. Cox, J. C. The constant elasticity of variance option pricing model. *J. Portf. Manag.* **23**, 15–17  
503 (1996).
- 504 33. Lo, C. F., Yuen, P. H. & Hui, C. H. Constant elasticity of variance option pricing model with time-  
505 dependent parameters. *Int. J. Theor. Appl. Financ.* **03**, 661–674 (2000).
- 506 34. Pirjol, D., Jafarpour, F. & Iyer-Biswas, S. Phenomenology of stochastic exponential growth. *Phys.*  
507 *Rev. E* **95**, 1–12 (2017).
- 508 35. Ghenim, L., Allier, C., Obeid, P., Hervé, L., Fortin, J. Y., Balakirev, M. & Gidrol, X. A new ultradian  
509 rhythm in mammalian cell dry mass observed by holography. *Sci. Rep.* **11**, 1290 (2021).
- 510 36. Cadart, C., Zlotek-Zlotkiewicz, E., Le Berre, M., Piel, M. & Matthews, H. K. Exploring the function  
511 of cell shape and size during mitosis. *Dev. Cell* **29**, 159–169 (2014).
- 512 37. Lancaster, O. M. & Baum, B. Shaping up to divide: coordinating actin and microtubule  
513 cytoskeletal remodelling during mitosis. *Semin. Cell Dev. Biol.* **34**, 109–115 (2014).
- 514 38. Neurohr, G. E., Terry, R. L., Lengefeld, J., Bonney, M., Brittingham, G. P., Moretto, F., Miettinen, T.  
515 P., Vaites, L. P., Soares, L. M., Paulo, J. A., Harper, J. W., Buratowski, S., Manalis, S., van Werven,  
516 F. J., Holt, L. J. & Amon, A. Excessive Cell Growth Causes Cytoplasm Dilution And Contributes to  
517 Senescence. *Cell* **176**, 1083-1097.e18 (2019).
- 518 39. Knapp, B. D., Odermatt, P., Rojas, E. R., Cheng, W., He, X., Huang, K. C. & Chang, F. Decoupling of

- 519 Rates of Protein Synthesis from Cell Expansion Leads to Supergrowth. *Cell Syst.* **9**, 434-445.e6  
520 (2019).
- 521 40. Oh, S., Lee, C. H., Yang, W., Li, A., Ran, C., Yin, W., Tabin, C. J., Fu, D., Xie, X. S. & Kirschner, M. W.  
522 In situ measurement of absolute concentrations by Normalized Raman Imaging. *bioRxiv* 629543  
523 (2019) doi:10.1101/629543.
- 524 41. Delarue, M., Brittingham, G. P., Pfeffer, S., Surovtsev, I. V., Pinglay, S., Kennedy, K. J., Schaffer, M.,  
525 Gutierrez, J. I., Sang, D., Poterewicz, G., Chung, J. K., Pitzko, J. M., Groves, J. T., Jacobs-Wagner,  
526 C., Engel, B. D. & Holt, L. J. mTORC1 Controls Phase Separation and the Biophysical Properties of  
527 the Cytoplasm by Tuning Crowding. *Cell* **174**, 338-349.e20 (2018).
- 528 42. Shahrezaei, V. & Marguerat, S. Connecting growth with gene expression: Of noise and numbers.  
529 *Curr. Opin. Microbiol.* **25**, 127–135 (2015).  
530  
531

## Annex A: Stochastic model of exponential growth with noise

This annex describes the stochastic growth model developed to interpret the reduction of noise on growth rate as a function of volume (Figure 5). We compared our data with the stochastic growth model of ref. 9. Following this study, we write

$$\begin{aligned} \frac{dV}{dt} &= \alpha V + \nu_\alpha V^\gamma, \\ \gamma &< 1. \end{aligned} \quad (1)$$

This model interpolates the regimes of additive noise ( $\gamma = 0$ ) from fluctuations of biophysical nature and corresponds to purely multiplicative noise ( $\gamma = 1$ ), corresponding to constant-amplitude fluctuations of the specific growth rate around its typical value  $\alpha$ . The intermediate case  $\gamma \in [0, 1]$  effectively describes a combination of biophysical noise and growth rate fluctuations. Here we assume that  $\nu_\alpha$  is a zero-mean delta-correlated Gaussian white noise, i.e.  $\langle \nu_\alpha(t) \rangle = 0$ , and  $\langle \nu_\alpha(t) \nu_\alpha(t + \tau) \rangle = \sigma^2 \delta(\tau)$ .

This model was used to compute analytically different proxies of growth-rate fluctuations, which we used to describe the data. We also verified the agreement of our theoretical predictions with direct numerical simulations of Eq. (1).

For  $\gamma < 1$ . Let us look at the expected rate and the rate of the mean in this case. Averaging Eq. (1) one has that

$$\left\langle \frac{dV}{dt} \right\rangle = \alpha \langle V(t) \rangle,$$

because the average of the noise is zero. Hence we always have that

$$\frac{1}{\langle V \rangle} \left\langle \frac{dV}{dt} \right\rangle = \alpha.$$

The growth rate in the model can be estimated as the conditional average of the speed at fixed volume. Indeed, since

$$dV = \alpha V dt + \sigma V^\gamma dW,$$

One immediately has that

$$\frac{1}{V} \left\langle \frac{dV}{dt} \right\rangle \Big|_V = \alpha.$$

Considering the variance, with some straightforward algebra one can obtain from Eq. (1) the expression

$$\text{Var} \left( \frac{dV}{dt} \right) \Big|_V = \frac{\sigma^2 V^{2\gamma}}{dt}.$$

This expression is compared to data in Figure 5c.

Defining  $q = \log(V)$ , one has that

$$dq = \frac{dq}{dV} dV + \frac{d^2q}{dV^2} dV^2 + \dots,$$

hence

$$dq|_V = \left( \alpha - \frac{\sigma^2}{2} V^{2\gamma-2} \right) dt + \sigma V^{\gamma-1} dW := \alpha_q dt + \sigma V^\beta dW, \quad (2)$$

bioRxiv preprint doi: <https://doi.org/10.1101/2021.06.03.446986>; this version posted June 3, 2021. The copyright holder for this preprint (which was not certified by peer review) is the author/funder, who has granted bioRxiv a license to display the preprint in perpetuity. It is made available under a [CC-BY-NC-ND 4.0 International license](#).

$$\alpha_q = \alpha_q(V) = \left( \alpha - \frac{\sigma^2}{2} V^{2\beta} \right) .$$

From Eq. (2), we compute with some algebra the Fano factor of  $dq$  (variance over mean), conditional to volume, which is not dependent on the time scale  $dt$ ,

$$\text{Fano}(dq)|_V = \frac{\sigma^2 V^{2\beta}}{\alpha_q(V)} .$$

This expression is compared to data in Figure 5c.
